# Supplementary material for: GSG2 promotes thyroid cancer via stabilizing AURKB and activating AKT pathway
Source: Aging (Albany NY). 2024 Mar 4;16(6):5091–107. doi: 10.18632/aging.205605 (PMC11006493; doi:10.18632/aging.205605)
Supplement: Supplementary Data File 1 [file aging-16-205605-s003.xls]

## Sheet: B-CPAP
Supplementary Data File 1. CCK8 raw data.
		Time(day)	shCtrl			shGSG2-1			shGSG2-2
	OD450	day 1	0.1189	0.1202	0.1216	0.1177	0.1176	0.1163	0.1181	0.1149	0.1183
		day 2	0.2831	0.2783	0.2796	0.1781	0.1794	0.17	0.1879	0.18	0.185
		day 3	0.4022	0.4076	0.412	0.2176	0.2256	0.2159	0.303	0.3077	0.3031
		day 4	0.6497	0.6598	0.6559	0.3219	0.3207	0.316	0.4372	0.42965	0.4
		day 5	0.8306	0.8359	0.8259	0.5511	0.5579	0.552	0.659	0.6789	0.6549
		Time(day)	shCtrl			shGSG2-1			shGSG2-2
	OD450 /fold	day 1	0.98891	0.999723	1.01137	1.00427	1.00341	0.992321	1.00854	0.981213	1.01025
		day 2	2.35459	2.31467	2.32548	1.51962	1.53072	1.45051	1.60461	1.53715	1.57985
		day 3	3.34516	3.39007	3.42667	1.85666	1.92491	1.84215	2.58753	2.62767	2.58839
		day 4	5.40366	5.48766	5.45523	2.74659	2.73635	2.69625	3.73356	3.66909	3.41588
		day 5	6.90823	6.95231	6.86914	4.70222	4.76024	4.7099	5.62767	5.79761	5.59266
	table 1	OD450	shCtrl	shGSG2-1	shGSG2-2				table 2	OD450 /fold	shCtrl	shGSG2-1	shGSG2-2
	AVERAGE	day 1	0.120233	0.117	0.1171				AVERAGE	day 1	1	1	1
		day 2	0.280333	0.17405	0.1843					day 2	2.33158	1.50028	1.57387
		day 3	0.407267	0.21675	0.3046					day 3	3.3873	1.87457	2.6012
		day 4	0.655133	0.31895	0.422283					day 4	5.44885	2.72639	3.60618
		day 5	0.8308	0.55155	0.664267					day 5	6.9099	4.72412	5.67264
	STDEV	day 1	0.00135031	0.000781025	0.00190788				STDEV	day 1	0.0112307	0.00666404	0.0162927
		day 2	0.00248261	0.00509346	0.00399625					day 2	0.0206482	0.0434596	0.0341268
		day 3	0.0049085	0.00517977	0.00268514					day 3	0.0408248	0.044196	0.0229304
		day 4	0.00509346	0.00311823	0.0196637					day 4	0.0423631	0.026606	0.167922
		day 5	0.005003	0.00369369	0.0128376					day 5	0.0416107	0.0315161	0.109629
												1.46269	1.21811
	T-Test			P Value
				day 5	day 5
	shCtrl	vs	shGSG2-1	< 0.001	< 0.001
	shCtrl	vs	shGSG2-2	< 0.001	< 0.001

## Sheet: TPC-1
CCK8 raw data
		Time(day)	shCtrl			shGSG2-1			shGSG2-2
	OD450	day 1	0.218	0.219	0.218	0.217	0.218	0.218	0.218	0.219	0.217
		day 2	0.494	0.498	0.495	0.381	0.382	0.385	0.421	0.418	0.419
		day 3	0.829	0.836	0.831	0.649	0.647	0.652	0.692	0.697	0.695
		day 4	1.105	1.102	1.108	0.86	0.864	0.869	0.907	0.904	0.901
		day 5	1.281	1.287	1.291	1.012	1.017	1.015	1.052	1.049	1.045
		Time(day)	shCtrl			shGSG2-1			shGSG2-2
	OD450 /fold	day 1	0.998473	1.00305	0.998473	0.996937	1.00153	1.00153	1	1.00459	0.995413
		day 2	2.2626	2.28092	2.26718	1.75038	1.75498	1.76876	1.93119	1.91743	1.92202
		day 3	3.79695	3.82901	3.80611	2.98162	2.97243	2.99541	3.17431	3.19725	3.18807
		day 4	5.06107	5.04733	5.07481	3.951	3.96937	3.99234	4.16055	4.14679	4.13303
		day 5	5.86718	5.89466	5.91298	4.64931	4.67228	4.66309	4.82569	4.81193	4.79358
	table 1	OD450	shCtrl	shGSG2-1	shGSG2-2				table 2	OD450 /fold	shCtrl	shGSG2-1	shGSG2-2
	AVERAGE	day 1	0.218333	0.2175	0.218				AVERAGE	day 1	1	1	1
		day 2	0.495667	0.383	0.419333					day 2	2.27023	1.75804	1.92355
		day 3	0.832	0.6505	0.694667					day 3	3.81069	2.98315	3.18654
		day 4	1.105	0.8645	0.904					day 4	5.06107	3.9709	4.14679
		day 5	1.28633	1.0135	1.04867					day 5	5.8916	4.66156	4.8104
	STDEV	day 1	0.00057735	0.00057735	0.001				STDEV	day 1	0.00264435	0.00265245	0.00458716
		day 2	0.00208167	0.00208167	0.00152753					day 2	0.00953435	0.00956355	0.007007
		day 3	0.00360555	0.00251661	0.00251661					day 3	0.016514	0.0115618	0.0115441
		day 4	0.003	0.00450925	0.003					day 4	0.0137405	0.0207163	0.0137615
		day 5	0.00503322	0.00251661	0.00351188					day 5	0.0230529	0.0115618	0.0161096
												1.26387	1.22476
	T-Test			P Value
				day 5	day 5
	shCtrl	vs	shGSG2-1	< 0.001	< 0.001
	shCtrl	vs	shGSG2-2	< 0.001	< 0.001
