# Supplementary material for: GSG2 promotes thyroid cancer via stabilizing AURKB and activating AKT pathway
Source: Aging (Albany NY). 2024 Mar 4;16(6):5091–107. doi: 10.18632/aging.205605 (PMC11006493; doi:10.18632/aging.205605)
Supplement: Supplementary Figure 1 [file aging-16-205605-s001.pdf]

## SUPPLEMENTARY FIGURE

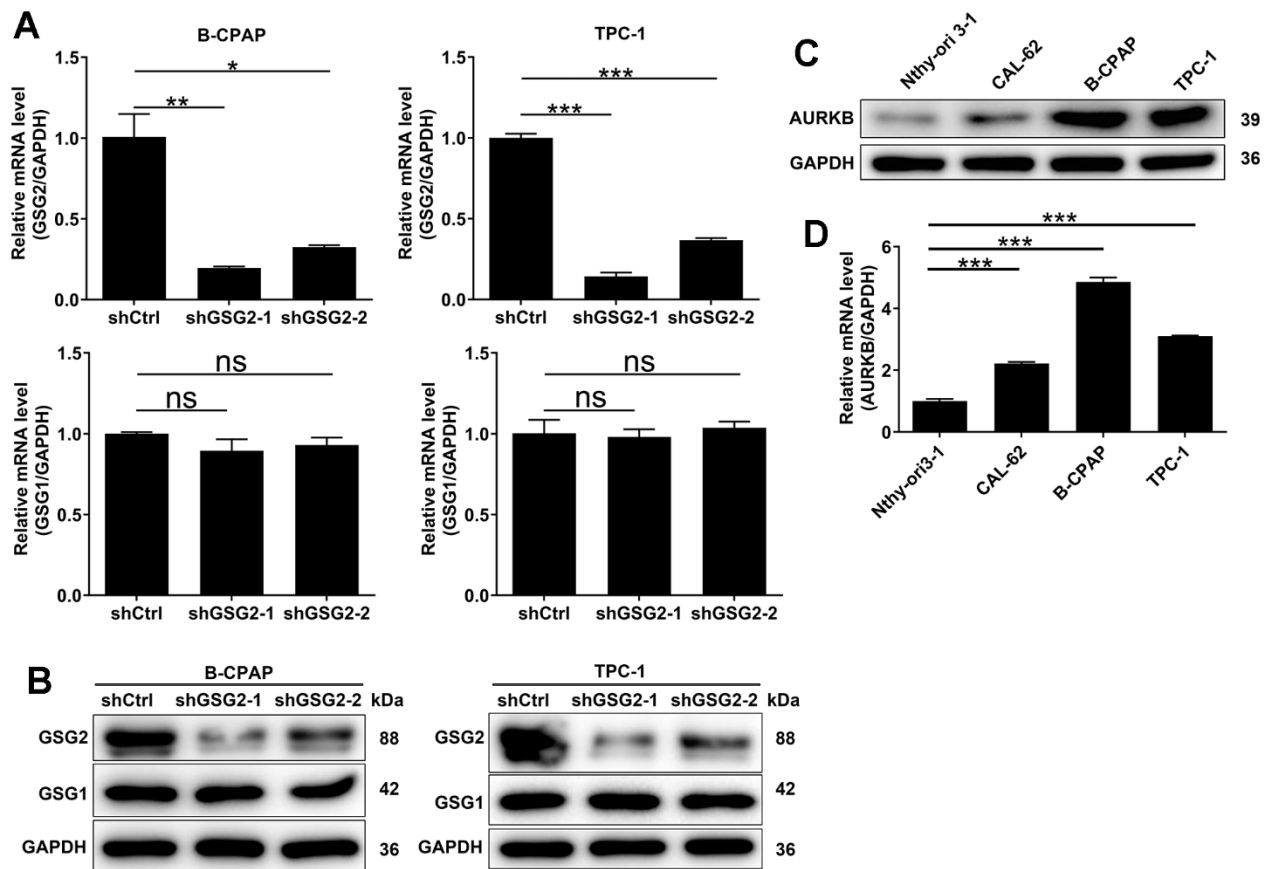

**Supplementary Figure 1.** (A, B) GSG1 and GSG2 levels were evaluated in B-CPAP and TPC-1 cells transfected with shGSG2-1 and shGSG2-2, as assessed by qRT-PCR (A) and western blot analyses (B). (C, D) The protein (C) and mRNA (D) levels of AURKB in thyroid cancer cell lines (CAL-62, B-CPAP, and TPC-1) and normal cells (Nthy-ori 3-1) were analyzed through western blot and qRT-PCR. Results were presented as mean  $\pm$  SD. \*  $P < 0.05$ , \*\*  $P < 0.01$ , \*\*\*  $P < 0.001$ .
