# Supplementary material for: GSG2 promotes thyroid cancer via stabilizing AURKB and activating AKT pathway
Source: publisher site journal article supplement (doi:10.18632/aging.205605), 2024-03-04
Supplement: Supplementary file [file aging-v16i6-205605-supplementary-material-SD2.pdf]

## SUPPLEMENTARY TABLES

**Supplementary Table 1. Antibodies used in Western blot and IHC analysis.**

| <b>Primary antibodies</b> | <b>Dilution in WB</b>  | <b>Source species</b> | <b>Company</b> | <b>Catalog no.</b> |
|---------------------------|------------------------|-----------------------|----------------|--------------------|
| GSG2                      | 1:1000                 | Rabbit                | Abcam          | ab21686            |
| BIRC5                     | 1:2000                 | Rabbit                | Proteintech    | 10508-1-AP         |
| AURKB                     | 1:500                  | Mouse                 | Santa Cruz     | sc-393357          |
| CDCA8                     | 1:1000                 | Rabbit                | Abcam          | ab74473            |
| SMURF1                    | 1:500                  | Rabbit                | Proteintech    | 55175-1-AP         |
| AKT                       | 1:3000                 | Rabbit                | CST            | 4691S              |
| p-AKT                     | 1:2000                 | Mouse                 | Proteintech    | 66444-1-Ig         |
| Ubiquitin                 | 1:1000                 | Mouse                 | Santa Cruz     | sc-47721           |
| GAPDH                     | 1:3000                 | Rabbit                | Bioworld       | AP0063             |
| <b>Secondary antibody</b> | <b>Dilution</b>        |                       | <b>Company</b> | <b>Catalog no.</b> |
| Goat Anti-Rabbit          | 1:3000                 |                       | Beyotime       | A0208              |
| Goat Anti- Mouse          | 1:3000                 |                       | Beyotime       | A0216              |
| <b>Primary antibodies</b> | <b>Dilution in IHC</b> | <b>Source species</b> | <b>Company</b> | <b>Catalog no.</b> |
| GSG2                      | 1:200                  | Rabbit                | Bioss          | BS-15413R          |
| Ki67                      | 1:100                  | Rabbit                | Abcam          | Ab16667            |
| <b>Secondary antibody</b> | <b>Dilution</b>        |                       | <b>Company</b> | <b>Catalog no.</b> |
| Goat Anti-Rabbit          | 1:400                  |                       | Abcam          | A6721              |

**Supplementary Table 2. Primers used in qRT-PCR.**

| <b>Gene</b> | <b>Forward primer sequence (5'-3')</b> | <b>Reverse primer sequence (5'-3')</b> |
|-------------|----------------------------------------|----------------------------------------|
| GSG2        | GGAAGGGGTGTTGGCGAAGT                   | TGAGGAGCAAGGGAGGGTAAG                  |
| TK1         | CAAGTATGCCAAAGACACTCGCTAC              | AACTGCCCTCGTCGATGCC                    |
| AURKB       | CATGGAGGAGTTGGCAGATG                   | CCTTGAGCCCTAAGAGCAGAT                  |
| RRM1        | GAAAGAGCAACCAGCAGAACC                  | GGGAAGCCAAATTACAAACAGC                 |
| E2F8        | CCTGAGATCCGCAACAGAGAT                  | AGATGTCATTATTCACAGCAGGG                |
| BIRC5       | TCTCAAGGACCACCGCATCT                   | TTTGCATGGGGTCGTCATCT                   |
| DDIAS       | GAAGGGGACATTATCTGG                     | TTCAGCAAACACCAACAT                     |
| CDCA8       | GCCAAGATGAGACGGGATGAC                  | TTCTCCAAGGGCGAAGTAGTC                  |
| DIAPH3      | TTTACCGACCACCAAGAA                     | GGCAAGGCACCAAACTGA                     |
| STIL        | CGGTTCTCACAGAACAAGACA                  | TAGGGGAACAGGGCATCAGA                   |
| SGOL2       | TGAGATGAGAAACGCCAGTC                   | TTCCCAAGATGACCCACGCT                   |
| CHEK1       | TTGGCTTGGAACAGTATTTTCG                 | CCAGCGAGCATTGCAGTAAGT                  |
| FOXM1       | AGTTCCCGGTGAACCAGTCA                   | ACACCACCTGTTCCCCAAA                    |
| SPC24       | TGGTCAAAGGCATCCATCA                    | GACTCCAGAGGTAGTCGCTGAT                 |
| GAPDH       | TGACTTCAACAGCGACACCCA                  | CACCCTGTTGCTGTAGCCAAA                  |
